# Supplementary material for: Enzyme-encapsulated metal–organic framework ZIF-8-mediated biosensor for ultrasensitive detection of urinary prostatic exosomal protein using a glucose meter
Source: Royal Society of Chemistry journal article supplement (doi:10.1039/d4ra05460a), 2024-01-01
Supplement: d4ra05460a1.pdf [file d4ra05460a1.pdf]

## Supporting Information

### Enzyme-Encapsulated Metal-Organic-Framework ZIF-8 mediated Biosensor for Ultrasensitive Detection of Urinary Prostatic Exosomal Protein Using a Glucose Meter

Mutu Lin,<sup>a</sup> Qiaohong Wang,<sup>a</sup> Yun Dai,<sup>a</sup> Jinyuan Chen<sup>\*b</sup> and Yiming Lin<sup>\*c</sup>

<sup>a</sup>. Department of Pharmacy, Quanzhou Maternity and Children's Hospital, Quanzhou, Fujian, 362000, China.

<sup>b</sup>. The Central Laboratory, Fujian Key Laboratory of Precision Medicine for Cancer, the First Affiliated Hospital, Fujian Medical University, Fuzhou, Fujian, 350005, China. E-mail: chenjinyuan@fjmu.edu.cn

<sup>c</sup>. Department of Clinical Laboratory, Quanzhou Maternity and Children's Hospital, Quanzhou, Fujian, 362000, China. E-mail: linyiming0819sina.com

\* Correspondence: chenjinyuan@fjmu.edu.cn; linyiming0819@sina.com.

**Table S1.** Calculation process of GOx loading rate.

| <b>Sample</b>             | <b><math>\Delta</math>Glu</b> |
|---------------------------|-------------------------------|
| Precipitation (GOx@ZIF-8) | 0.583 mM                      |
| Supernatant GOx           | 0.780 mM                      |

$$\text{Loading rate of GOx (\%)} = \frac{\Delta\text{Glu of GOx@ZIF-8}}{\Delta\text{Glu of GOx@ZIF-8} + \Delta\text{Glu of Supernatant GOx}} \quad \text{Eq(1)}$$

$$\text{Loading rate of GOx (\%)} = \frac{0.583}{0.583 + 0.780} \times 100\% = 42.7\%$$

**Table S2.** Comparison of different methods for PSEP detection.

| <b>Method</b>            | <b>Detection<br/>(<math>\mu\text{g/mL}</math>)</b> | <b>Range</b> | <b>LOD (<math>\mu\text{g/mL}</math>)</b> | <b>Time</b> | <b>Reference</b>                               |
|--------------------------|----------------------------------------------------|--------------|------------------------------------------|-------------|------------------------------------------------|
| ELISA                    | 300-10000                                          |              | -                                        | 75 min      | Angke<br>Biomedical<br>Technology<br>Co., Ltd. |
| ELISA                    | 0-320                                              |              | -                                        | 75 min      | Tianjin Kevino<br>Biotechnology<br>Co., Ltd.   |
| FMs-LFA*                 | 1200-10000                                         |              | 300                                      | 15 min      | Angke<br>Biomedical<br>Technology<br>Co., Ltd. |
| PGM-based<br>Immunoassay | 0.375-48                                           |              | 0.23                                     | 45 min      | Our work                                       |

\* fluorescent microspheres lateral flow immunoassay (FMs-LFA).

**Table S3.** The repeatability experiments of PGM-based immunosensor for PSEP detection.

| <b>C<sub>PSEP</sub></b> | <b>1</b> | <b>2</b> | <b>3</b> | <b>4</b> | <b>5</b> | <b>RSD</b> |
|-------------------------|----------|----------|----------|----------|----------|------------|
| 48 pg/mL                | 3.2 mM   | 3.4 mM   | 3.2 mM   | 3.5 mM   | 3.1 mM   | 5%         |
| 6 pg/mL                 | 1.8 mM   | 1.9 mM   | 1.7 mM   | 1.5 mM   | 2.2 mM   | 14%        |

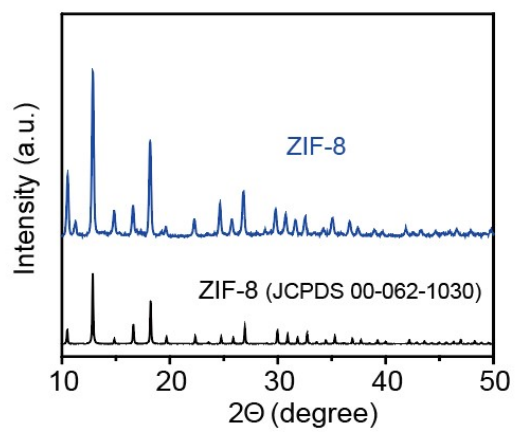

**Figure S1.** XRD patterns for simulated ZIF-8 (JCPDS 00-062-1030) and as-synthesized ZIF-8.

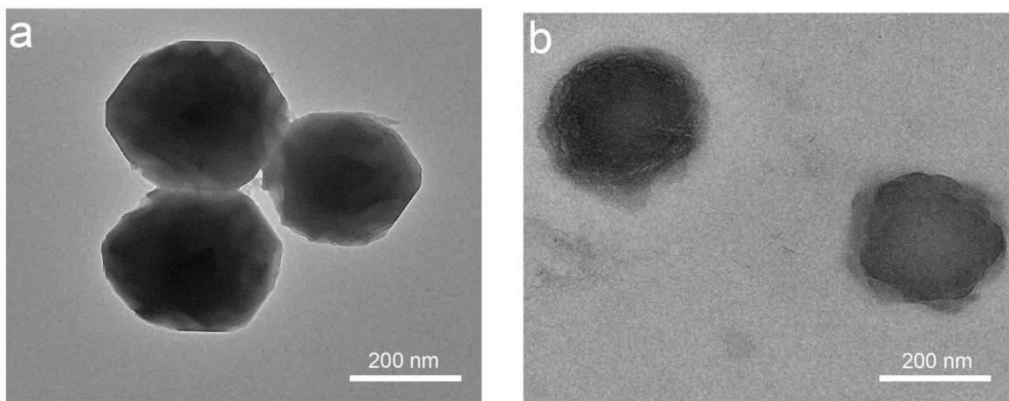

**Figure S2.** TEM images of pure ZIF-8 and GOx@ZIF-8.

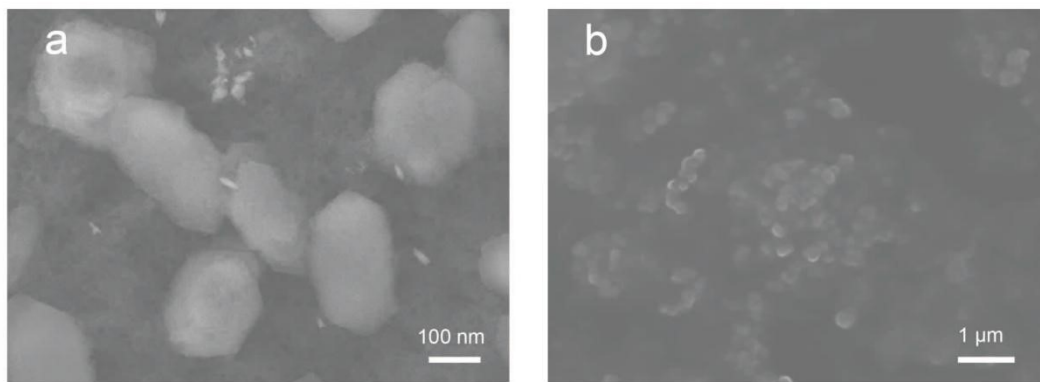

**Figure S3.** SEM images of ZIF-8 at 100 nm scale and 1  $\mu\text{m}$  scale.

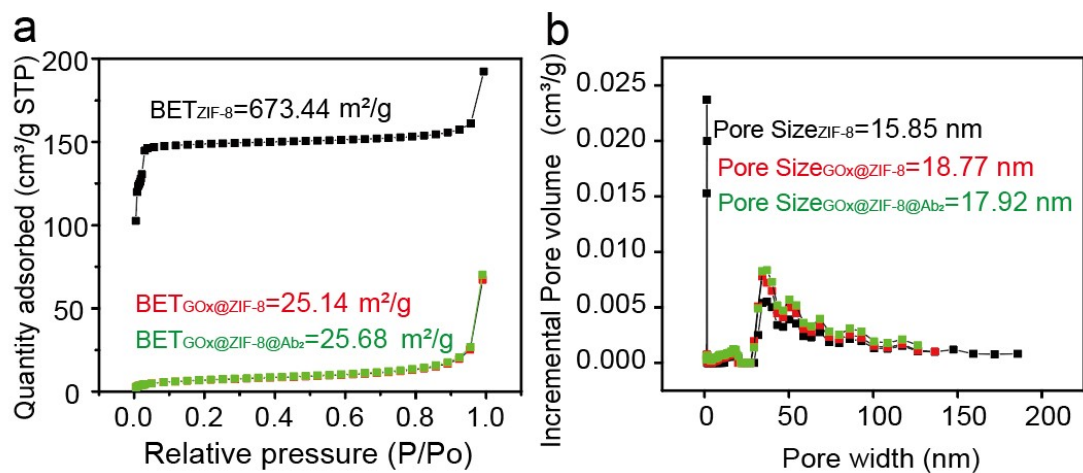

**Figure S4.** Nitrogen adsorption isotherms(a) and pore size analysis (b) of pure ZIF-8, GOx@ZIF-8 and GOx@ZIF-8@Ab<sub>2</sub>.



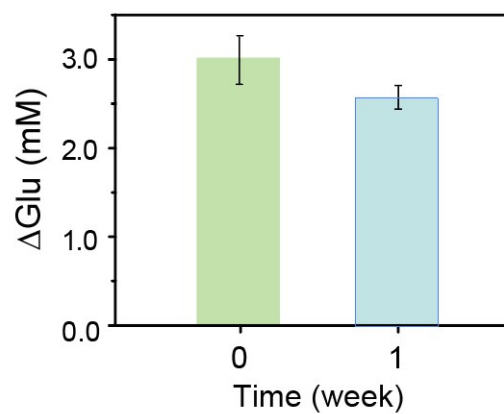

**Figure S5.** Stability of the fabricated immunosensor for PSEP (48 pg/mL) detection at room temperature.

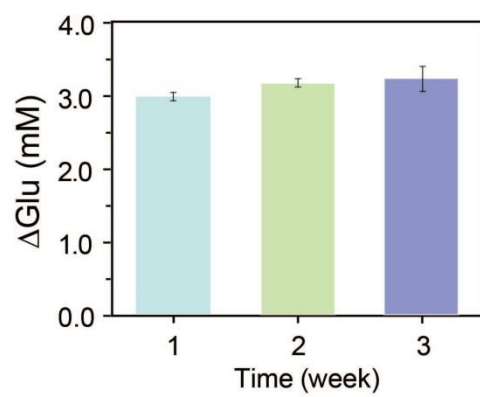

**Figure S6.** Stability of the fabricated immunosensor for PSEP detection (48 pg/mL).

**Calculation of LOD.** A glucose consumption measurement for blank samples was implemented with five parallel tests previously, which exhibited a mean of 1.5909 and a standard deviation (SD) of 0.02. The slope (b) and intercept (a) of the linear regression equation for PSEP detection was 0.03 and 1.65, respectively. Therefore, to get more accurate LOD, we recalculated our LOD by change the S/N as follows<sup>S1</sup>.

$$\text{LOD} = (y_0 + 3.3 \times \text{SD} - a) / b$$

Therefore, according to the new S/N, the LOD was estimated as 0.23 pg/mL.

#### References

S1 H. Moulahoum and F. Ghorbanizamani, *Biosens. Bioelectron.* 2024, **264**, 116670.
